# Supplementary material for: Label-free quantitative proteomics and stress responses in pigs—The case of short or long road transportation
Source: PubMed Central journal article supplement (PMC9683611; doi:10.1371/journal.pone.0277950), 2022-11-23

# Stress induced phosphoprotein 1 (STIP1)

Technical replicates (A, B, C):

- X: Samples not used
- 1 to 4: non-stressed pigs
- 5 to 8: stressed pigs

Membranes stained using the reversible stain

Western blot STIP1

**A**

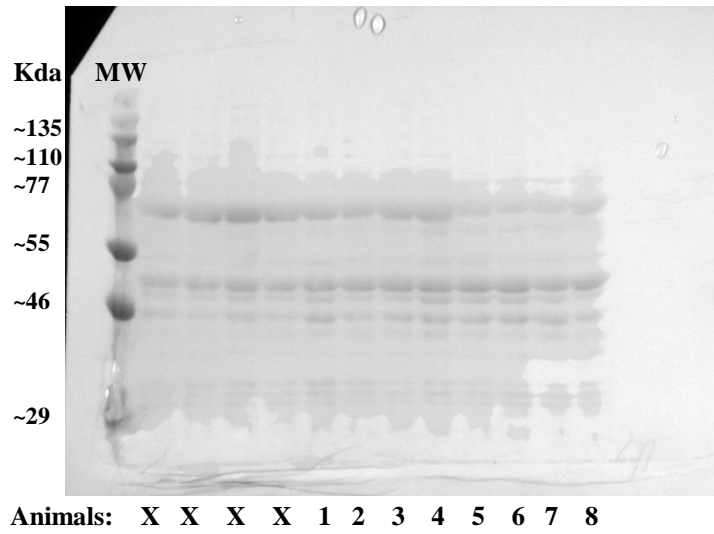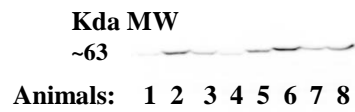

**B**

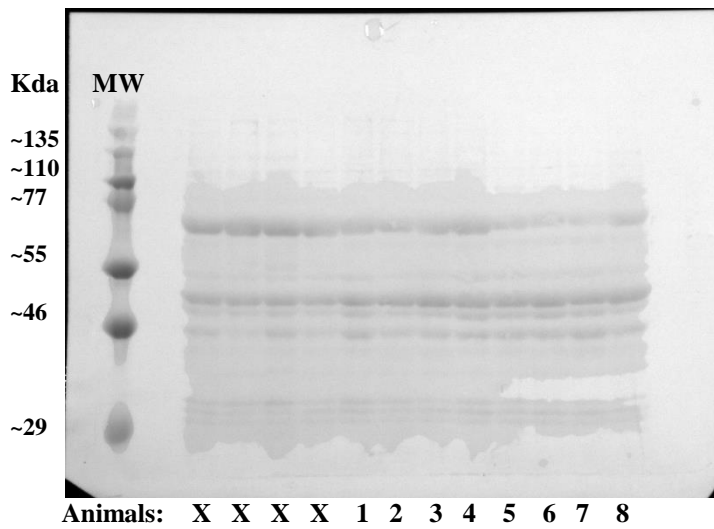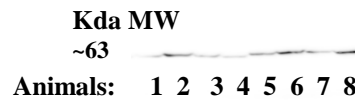

**C**

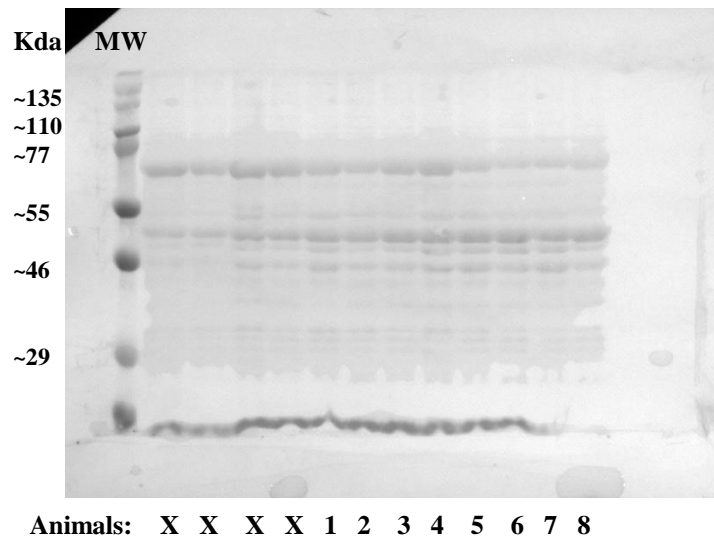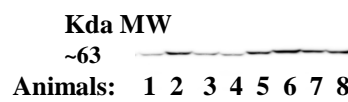

# Catalase (CAT)

Technical replicates (A, B, C):

- X: Samples not used
- 1 to 4: non-stressed pigs
- 5 to 8: stressed pigs

Membranes stained using the reversible stain

Western blot CAT

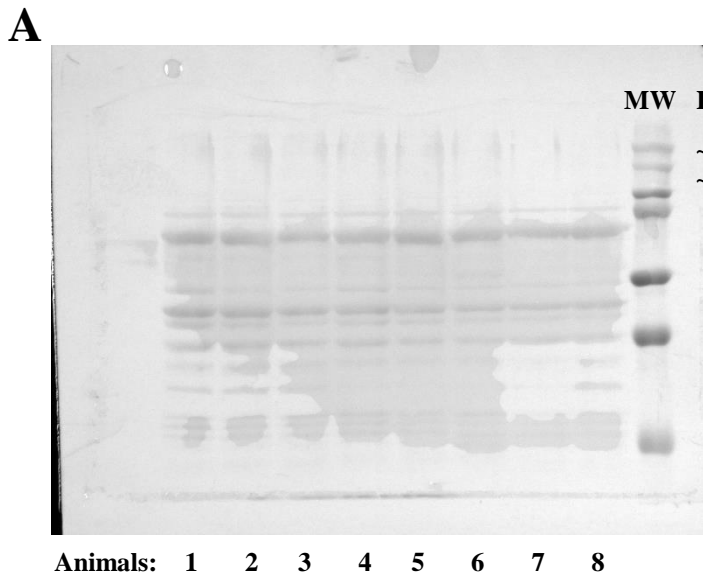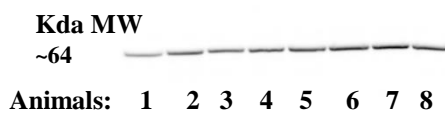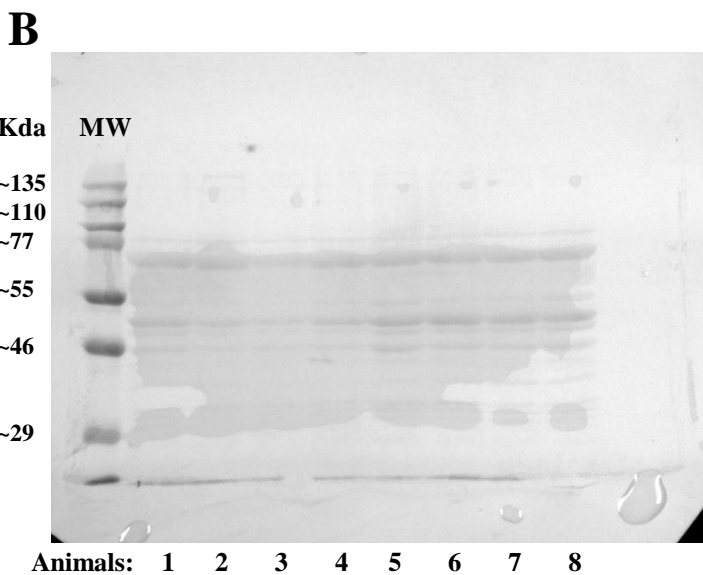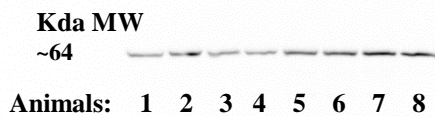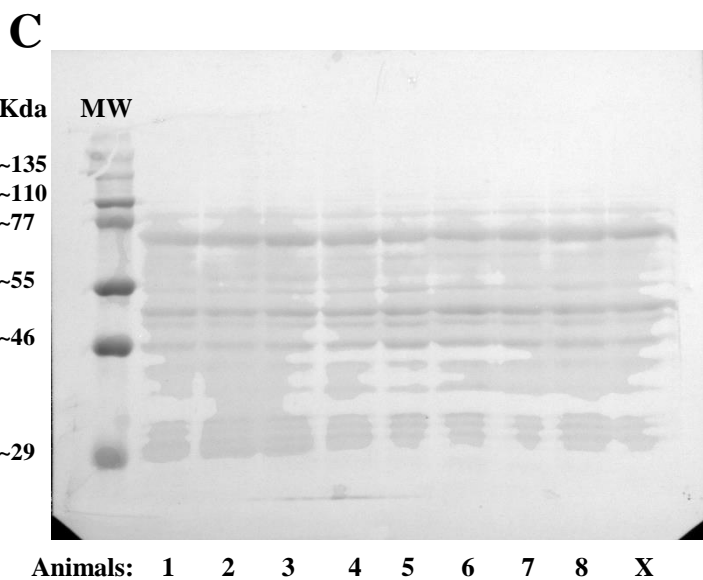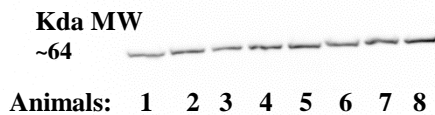

Supplement: pone.0277950.s003.pdf [file pone.0277950.s003.pdf]
